# Supplementary material for: Predicting antimicrobial peptides with improved accuracy by incorporating the compositional, physico-chemical and structural features into Chou’s general PseAAC
Source: PubMed Central journal article supplement (PMC5304217; doi:10.1038/srep42362), 2017-02-13
Supplement: srep42362-s1.pdf [file srep42362-s1.pdf]

# **Predicting antimicrobial peptides with improved accuracy by incorporating the compositional, physico-chemical and structural features into Chou's general PseAAC**

**Prabina Kumar Meher<sup>1</sup>, Tanmaya Kumar Sahu<sup>2</sup>, Varsha Saini<sup>3</sup> and A. R. Rao<sup>2,\*</sup>**

<sup>1</sup>Division of Statistical Genetics, ICAR-Indian Agricultural Statistics Research Institute, New Delhi-110012, India

<sup>2</sup>Centre for Agricultural Bioinformatics, ICAR-Indian Agricultural Statistics Research Institute, New Delhi-110012, India

<sup>3</sup>Department of Bioinformatics, Janta Vedic College, Baraut, Baghpat-250611, Uttar Pradesh, India

**Supplementary Table S1.** The values of performance metrics of SVM for predicting the antibacterial peptides for sample sizes 100 and 500.

| Sample size | Features                   | Performance metrics |            |            |             |
|-------------|----------------------------|---------------------|------------|------------|-------------|
|             |                            | Sn±SE               | Sp±SE      | Ac±SE      | MCC         |
| 100         | AAC+PAAC                   | 93.43±2.50          | 95.61±1.90 | 94.52±1.45 | 0.891±0.029 |
|             | AAC+NAAC                   | 93.00±2.64          | 95.78±1.98 | 94.39±1.57 | 0.888±0.031 |
|             | PAAC+NAAC                  | 93.30±2.66          | 95.46±2.08 | 94.38±1.57 | 0.888±0.031 |
|             | AAC+PAAC+NAAC              | 93.70±2.11          | 95.59±2.04 | 94.65±1.40 | 0.893±0.028 |
|             | AAC+PAAC + PHYC+STRL       | 97.38±1.48          | 96.65±1.84 | 97.02±1.19 | 0.940±0.024 |
|             | AAC+NAAC + PHYC+STRL       | 97.42±1.49          | 96.68±1.85 | 97.05±1.17 | 0.941±0.023 |
|             | PAAC+NAAC + PHYC+STRL      | 97.68±1.56          | 96.83±1.68 | 97.26±1.13 | 0.945±0.022 |
|             | AAC+ PAAC+NAAC + PHYC+STRL | 97.69±1.63          | 96.85±1.68 | 97.28±1.14 | 0.946±0.023 |
| 500         | AAC+PAAC                   | 91.42±1.11          | 93.95±0.96 | 92.69±0.72 | 0.854±0.014 |
|             | AAC+NAAC                   | 91.26±1.06          | 94.21±0.81 | 92.73±0.62 | 0.855±0.012 |
|             | PAAC+NAAC                  | 91.44±1.15          | 93.99±1.06 | 92.72±0.70 | 0.855±0.014 |
|             | AAC+PAAC+NAAC              | 91.34±1.03          | 94.10±0.85 | 92.72±0.58 | 0.855±0.012 |
|             | AAC+PAAC + PHYC+STRL       | 97.16±0.72          | 95.38±0.90 | 96.27±0.61 | 0.925±0.012 |
|             | AAC+NAAC + PHYC+STRL       | 97.01±0.74          | 95.22±0.87 | 96.12±0.49 | 0.923±0.010 |
|             | PAAC+NAAC + PHYC+STRL      | 97.12±0.64          | 95.39±0.81 | 96.26±0.49 | 0.925±0.010 |
|             | AAC+ PAAC+NAAC + PHYC+STRL | 97.22±0.72          | 95.42±0.84 | 96.31±0.51 | 0.926±0.010 |

SE: Standard Error

**Supplementary Table S2.** The values of performance metrics of SVM for predicting the antiviral peptides for the sample sizes 100 and 500.

| Sample size | Features                   | Performance metrics |            |            |             |
|-------------|----------------------------|---------------------|------------|------------|-------------|
|             |                            | Sn±SE               | Sp±SE      | Ac±SE      | MCC         |
| 100         | AAC+PAAC                   | 90.31±2.96          | 91.12±3.14 | 90.72±1.87 | 0.814±0.037 |
|             | AAC+NAAC                   | 90.23±3.18          | 91.03±3.05 | 90.63±1.88 | 0.813±0.037 |
|             | PAAC+NAAC                  | 90.47±3.14          | 91.60±2.80 | 91.04±1.58 | 0.821±0.032 |
|             | AAC+PAAC+NAAC              | 90.10±3.24          | 91.35±2.83 | 90.73±1.63 | 0.815±0.032 |
|             | AAC+PAAC + PHYC+STRL       | 91.26±3.29          | 92.18±3.12 | 91.72±1.84 | 0.834±0.036 |
|             | AAC+NAAC + PHYC+STRL       | 91.45±3.16          | 91.91±3.05 | 91.68±1.79 | 0.834±0.036 |
|             | PAAC+NAAC + PHYC+STRL      | 91.42±2.93          | 92.81±2.47 | 92.12±1.49 | 0.842±0.030 |
|             | AAC+ PAAC+NAAC + PHYC+STRL | 91.41±2.76          | 92.82±2.79 | 92.12±1.68 | 0.841±0.033 |
| 500         | AAC+PAAC                   | 86.66±1.00          | 90.09±1.11 | 88.38±0.60 | 0.768±0.012 |
|             | AAC+NAAC                   | 86.68±1.15          | 90.31±0.96 | 88.49±0.67 | 0.770±0.013 |
|             | PAAC+NAAC                  | 86.71±1.10          | 90.40±1.23 | 88.55±0.77 | 0.772±0.015 |
|             | AAC+PAAC+NAAC              | 86.49±0.99          | 90.30±1.02 | 88.40±0.63 | 0.768±0.013 |
|             | AAC+PAAC + PHYC+STRL       | 89.27±1.00          | 90.98±0.94 | 90.13±0.69 | 0.803±0.014 |
|             | AAC+NAAC + PHYC+STRL       | 89.23±1.00          | 90.93±1.05 | 90.08±0.68 | 0.802±0.014 |
|             | PAAC+NAAC + PHYC+STRL      | 89.42±1.12          | 91.10±1.19 | 90.26±0.64 | 0.805±0.013 |
|             | AAC+ PAAC+NAAC + PHYC+STRL | 89.46±0.98          | 91.08±1.13 | 90.26±0.69 | 0.806±0.014 |

SE: Standard Error

**Supplementary Table S3.** The values of performance metrics of SVM for predicting the antifungal peptides for the sample sizes 100 and 500.

| Sample size | Features                   | Performance metrics |            |            |             |
|-------------|----------------------------|---------------------|------------|------------|-------------|
|             |                            | Sn±SE               | Sp±SE      | Ac±SE      | MCC         |
| 100         | AAC+PAAC                   | 93.09±2.38          | 95.44±2.31 | 94.27±1.64 | 0.886±0.033 |
|             | AAC+NAAC                   | 93.58±2.33          | 95.28±1.91 | 94.43±1.47 | 0.889±0.029 |
|             | PAAC+NAAC                  | 93.24±2.49          | 95.44±1.90 | 94.34±1.50 | 0.887±0.030 |
|             | AAC+PAAC+NAAC              | 93.41±2.28          | 95.35±1.85 | 94.38±1.37 | 0.888±0.027 |
|             | AAC+PAAC + PHYC+STRL       | 94.78±2.02          | 95.80±1.98 | 95.29±1.41 | 0.906±0.028 |
|             | AAC+NAAC + PHYC+STRL       | 94.97±2.31          | 95.64±1.91 | 95.31±1.40 | 0.906±0.028 |
|             | PAAC+NAAC + PHYC+STRL      | 95.19±2.14          | 95.99±1.87 | 95.59±1.25 | 0.912±0.025 |
|             | AAC+ PAAC+NAAC + PHYC+STRL | 95.20±1.97          | 96.00±1.96 | 95.60±1.34 | 0.915±0.027 |
| 500         | AAC+PAAC                   | 91.50±1.09          | 93.60±0.94 | 92.55±0.68 | 0.851±0.014 |
|             | AAC+NAAC                   | 91.28±1.07          | 93.51±0.88 | 92.39±0.61 | 0.848±0.012 |
|             | PAAC+NAAC                  | 91.53±1.00          | 93.65±1.05 | 92.59±0.73 | 0.852±0.015 |
|             | AAC+PAAC+NAAC              | 91.59±0.86          | 93.61±0.95 | 92.60±0.61 | 0.852±0.012 |
|             | AAC+PAAC + PHYC+STRL       | 93.08±0.86          | 94.47±0.78 | 93.78±0.53 | 0.876±0.011 |
|             | AAC+NAAC + PHYC+STRL       | 92.93±0.93          | 94.48±0.83 | 93.71±0.62 | 0.874±0.012 |
|             | PAAC+NAAC + PHYC+STRL      | 92.90±0.78          | 94.50±0.81 | 93.70±0.54 | 0.874±0.011 |
|             | AAC+ PAAC+NAAC + PHYC+STRL | 92.93±1.06          | 94.57±0.78 | 93.75±0.64 | 0.875±0.013 |

SE: Standard Error
